# Supplementary material
Source: PubMed Central journal article supplement (PMC3654563)
Supplement: jm400140q_si_001.pdf [file jm400140q_si_001.pdf]

## Supporting Information

*Biophysical fragment screening of the  $\beta_1$ -adrenergic receptor: Identification of high affinity aryl piperazine leads using structure-based drug design*

*John A. Christopher,<sup>\*,†</sup> Jason Brown,<sup>†</sup> Andrew S. Doré,<sup>†</sup> James C. Errey,<sup>†</sup> Markus Koglin,<sup>†</sup>, Fiona H. Marshall,<sup>†</sup> David G. Myszka,<sup>‡</sup> Rebecca L. Rich,<sup>‡</sup> Christopher G. Tate,<sup>§</sup> Benjamin Tehan,<sup>†</sup> Tony Warne,<sup>§</sup> Miles Congreve.<sup>†</sup>*

<sup>†</sup> Heptares Therapeutics Ltd., BioPark, Welwyn Garden City, Hertfordshire, AL7 3AX, U.K.

<sup>‡</sup> Biosensor Tools LLC, Salt Lake City, Utah 84103 United States.

<sup>§</sup> MRC Laboratory of Molecular Biology, Francis Crick Avenue, Cambridge Biomedical Campus, Cambridge CB2 0QH, U.K.

### Table of contents

- S2** Table 1: Supplier information and LCMS QC data for fragments **7-24**.
- S3** <sup>1</sup>H and <sup>13</sup>C NMR data for compounds **19** and **20**; <sup>1</sup>H NMR data for compounds **9**, **21**, **15** and **17**.
- S9** Muscarinic M<sub>1</sub>-M<sub>4</sub> acetylcholine receptor membrane binding and agonist functional assay details and data for compounds **12**, **13**, **19**, **20**.
- S11** Table 2: Data processing, refinement and evaluation statistics.
- S13** Table 3: Receptor-ligand interactions and ligand binding pocket dimensions.
- S15** Figure 1: Omit maps for the ligands **19** and **20** in the crystal structures.
- S16** References

**Table 1: Supplier information and LCMS QC data for fragments 7-24.**

Fragments 7–24 were purchased from ABCR, Acros, Alfa-Aesar, Apollo, Asinex, Chembridge, Fluorochem, Maybridge, Peakdale Molecular, and Sigma-Aldrich as detailed below. The compounds were supplied with purities of >95% as determined by the vendors. LCMS quality control data generated by the authors are detailed below; compounds determined to be < 95% purity by LCMS were additionally analysed by <sup>1</sup>H NMR and confirmed to be > 95%.

| Compound | Supplier      | Supplier ID  | MW                 | LCMS purity <sup>a</sup> | MS data <sup>b</sup><br>m/z (ESI +) | QC comment |
|----------|---------------|--------------|--------------------|--------------------------|-------------------------------------|------------|
| 7        | Apollo        | PC4343       | 230.2              | >98%                     | 231.2                               | -          |
| 8        | Sigma-Aldrich | Q1004        | 213.3 <sup>c</sup> | >98%                     | 214.2                               | -          |
| 9        | Acros         | 13082        | 162.2              | 93%                      | 163.2                               | <i>f</i>   |
| 10       | Fluorochem    | 005906       | 231.2              | >98%                     | 232                                 | -          |
| 11       | Fluorochem    | 033323       | 233.2              | >98%                     | 233.2                               | -          |
| 12       | Apollo        | OR6834       | 231.1              | >98%                     | 231.0, 233.0                        | -          |
| 13       | Apollo        | OR1481       | 231.1              | >98%                     | 231.0, 233.0                        | -          |
| 14       | Fluorochem    | 9768         | 231.1              | >98%                     | 231.0, 233.0                        | -          |
| 15       | Maybridge     | AC13696      | 190.3              | 94%                      | 191.2                               | <i>f</i>   |
| 16       | Maybridge     | AC13693      | 190.3              | >98%                     | 191.2                               | -          |
| 17       | Apollo        | PC0865       | 298.2              | 91%                      | 299.1                               | <i>f</i>   |
| 18       | Fluorochem    | 019027       | 222.3              | 95%                      | 223.2                               | -          |
| 19       | ABCR          | AB153444     | 201.3 <sup>d</sup> | 95%                      | 202.2                               | <i>g</i>   |
| 20       | Alfa-Aesar    | H50881       | 227.3              | >98%                     | 228.2                               | <i>g</i>   |
| 21       | Peakdale      | 1014191      | 295.4 <sup>e</sup> | 93%                      | 296.2                               | <i>f</i>   |
| 22       | Apollo        | OR27760      | 227.3              | >98%                     | 228.2                               | -          |
| 23       | Chembridge    | 9140648      | 320.5              | >98%                     | 321.2                               | -          |
| 24       | Asinex        | ASN 05542083 | 302.4              | >98%                     | 303.2                               | -          |

<sup>a</sup> Data generated by Heptares. <sup>b</sup> LCMS data with electrospray ionisation were generated at Heptares using an Agilent 1260 Infinity LC with Diode Array Detector coupled to an Agilent 6120B Single Quadrupole MS with API-ES source. <sup>c</sup> Supplied as the Maleate salt (free base MW 213.3). <sup>d</sup> Supplied as the dihydrochloride salt (free base MW 201.3). <sup>e</sup> Supplied as the hydrochloride salt (free base MW 295.4). <sup>f</sup> Further analysed by <sup>1</sup>H NMR and determined to be > 95% purity, spectroscopic data are below. <sup>g</sup> Further analysed by <sup>1</sup>H and <sup>13</sup>C NMR prior to crystallography trials, spectroscopic data are below.

<sup>1</sup>H NMR (d<sup>6</sup>-DMSO) and <sup>13</sup>C NMR (d<sup>6</sup>-DMSO / D<sub>2</sub>O 2:1) data for compound 19.

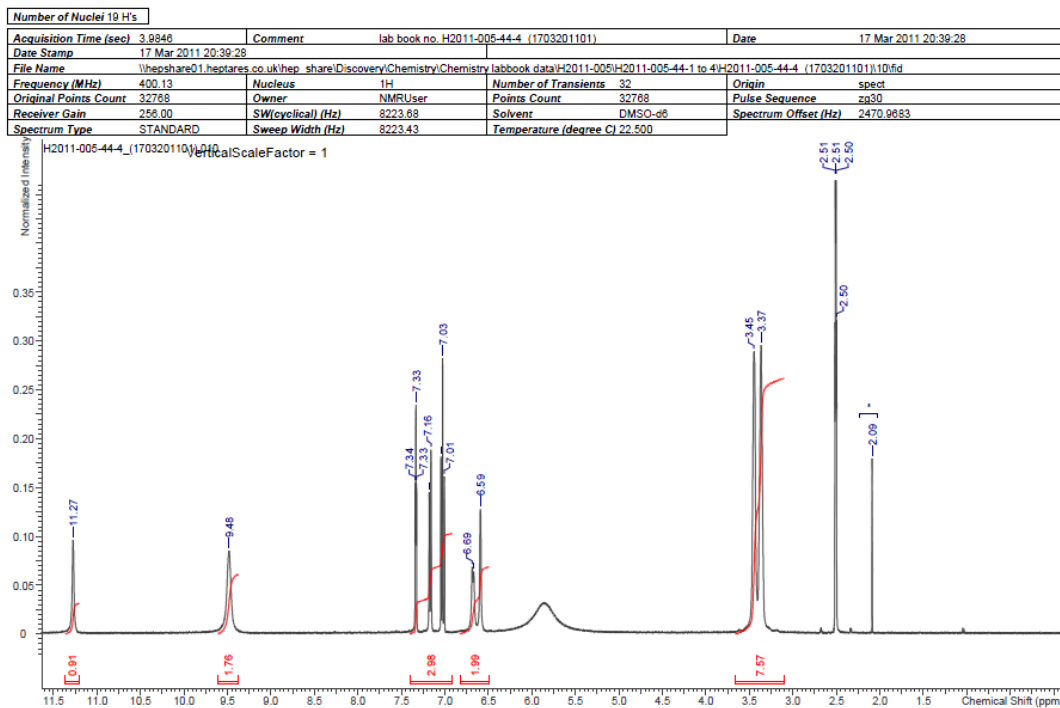

<sup>1</sup>H NMR (400 MHz, DMSO-*d*<sub>6</sub>) δ ppm 3.37 (br. s, 4 H), 3.45 (br. s, 4 H), 6.59 (br. s, 1 H), 6.68 (d, *J*=6.8 Hz, 1 H), 7.03 (t, *J*=7.9 Hz, 1 H), 7.17 (d, *J*=8.0 Hz, 1 H), 7.33 (t, *J*=2.8 Hz, 1 H), 9.48 (br. s, 2 H), 11.27 (br. s, 1 H).

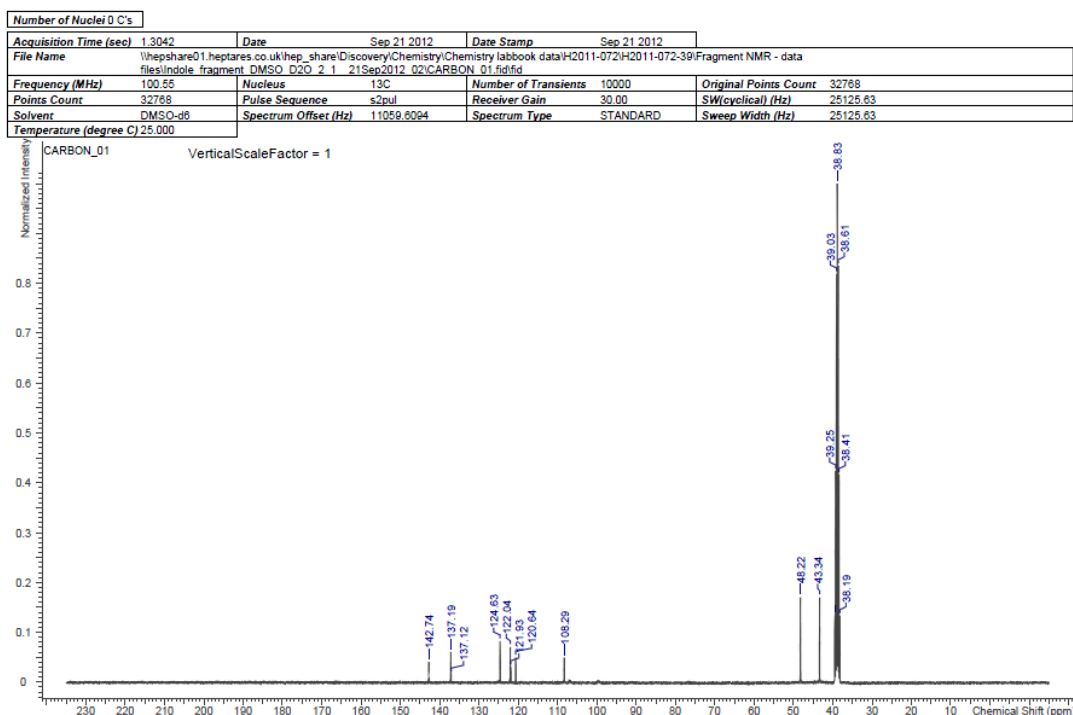

$^{13}\text{C}$  NMR (101 MHz, DMSO- $d_6$  / D $_2$ O 2:1),  $\delta$  ppm 43.34 (s, 2 C), 48.22 (s, 2 C), 108.29 (s, 1 C), 120.64 (s, 1 C), 121.93 (s, 1 C), 122.04 (s, 1 C), 124.63 (s, 1 C), 137.12 (s, 1 C), 137.19 (s, 1 C), 142.74 (s, 1 C).

$^1\text{H}$  and  $^{13}\text{C}$  NMR ( $d^6$ -DMSO) data for compound 20.

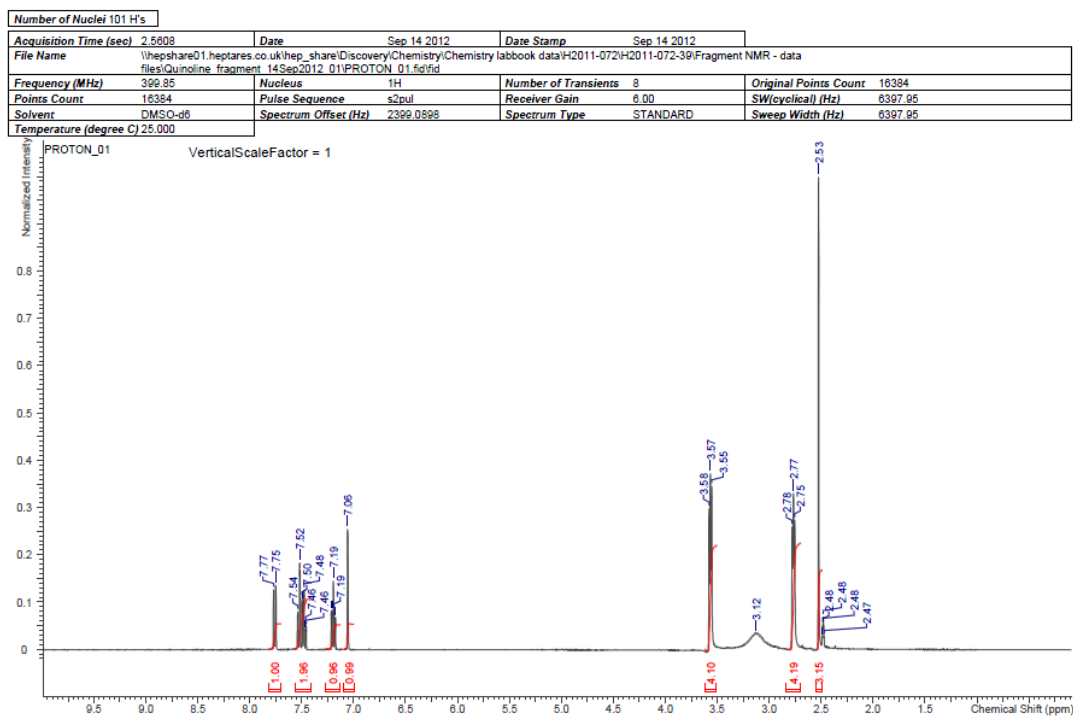

$^1\text{H}$  NMR (400 MHz, DMSO- $d_6$ )  $\delta$  ppm 2.53 (s, 3 H), 2.75 - 2.78 (m, 4 H), 3.55 - 3.58 (m, 4 H), 7.06 (s, 1 H), 7.19 (ddd,  $J=8.1, 6.7, 1.6$  Hz, 1 H), 7.46 - 7.50 (m, 2 H), 7.76 (d,  $J=8.2$  Hz, 1 H).

| Number of Nuclei 19 C's |                                                                                                                                                                                |                       |                 |
|-------------------------|--------------------------------------------------------------------------------------------------------------------------------------------------------------------------------|-----------------------|-----------------|
| Acquisition Time (sec)  | 1.3042                                                                                                                                                                         | Date                  | Sep 14 2012     |
| File Name               | Vhepshare01.heptares.co.uk/hep_share/Discovery/Chemistry/Chemistry labbook data/H2011-072/H2011-072-39/Fragment NMR - data files/Quinoline_fragment_14Sep2012_02/CARBON_01.fid |                       |                 |
| Frequency (MHz)         | 100.55                                                                                                                                                                         | Nucleus               | <sup>13</sup> C |
| Points Count            | 32788                                                                                                                                                                          | Pulse Sequence        | s2pul           |
| Solvent                 | DMSO-d6                                                                                                                                                                        | Spectrum Offset (Hz)  | 11059.6094      |
| Temperature (degree C)  | 25.000                                                                                                                                                                         | Receiver Gain         | 30.00           |
|                         |                                                                                                                                                                                | Spectrum Type         | STANDARD        |
|                         |                                                                                                                                                                                | Original Points Count | 32788           |
|                         |                                                                                                                                                                                | SW(cyclical) (Hz)     | 25125.63        |
|                         |                                                                                                                                                                                | Sweep Width (Hz)      | 25125.63        |

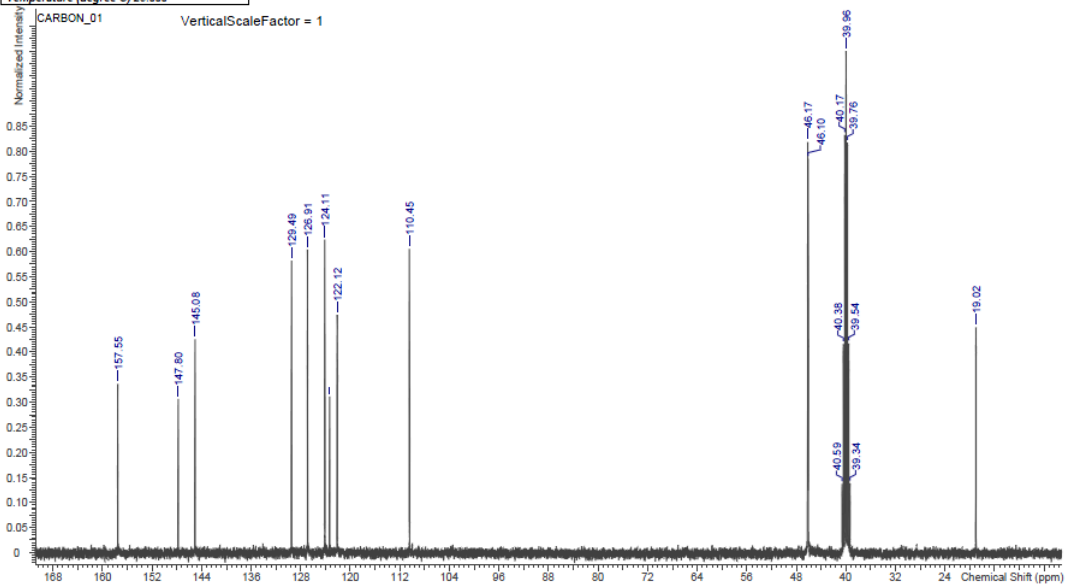

<sup>13</sup>C NMR (101 MHz, DMSO-*d*<sub>6</sub>) δ ppm 19.02 (s, 1 C), 46.10 (s, 2 C), 46.17 (s, 2 C), 110.45 (s, 1 C), 122.12 (s, 1 C), 123.36 (s, 1 C), 124.11 (s, 1 C), 126.91 (s, 1 C), 129.49 (s, 1 C), 145.08 (s, 1 C), 147.80 (s, 1 C), 157.55 (s, 1 C).



Compound **15**:  $^1\text{H}$  NMR (400 MHz,  $\text{DMSO-}d_6$ )  $\delta$  ppm 2.08 (s, 3 H), 2.14 (s, 3 H), 2.79 (br. s, 4 H), 2.94 (br. s, 4 H), 6.60 (d,  $J=7.4$  Hz, 1 H), 6.70 (br. s, 1 H), 6.93 (d,  $J=8.2$  Hz, 1 H).

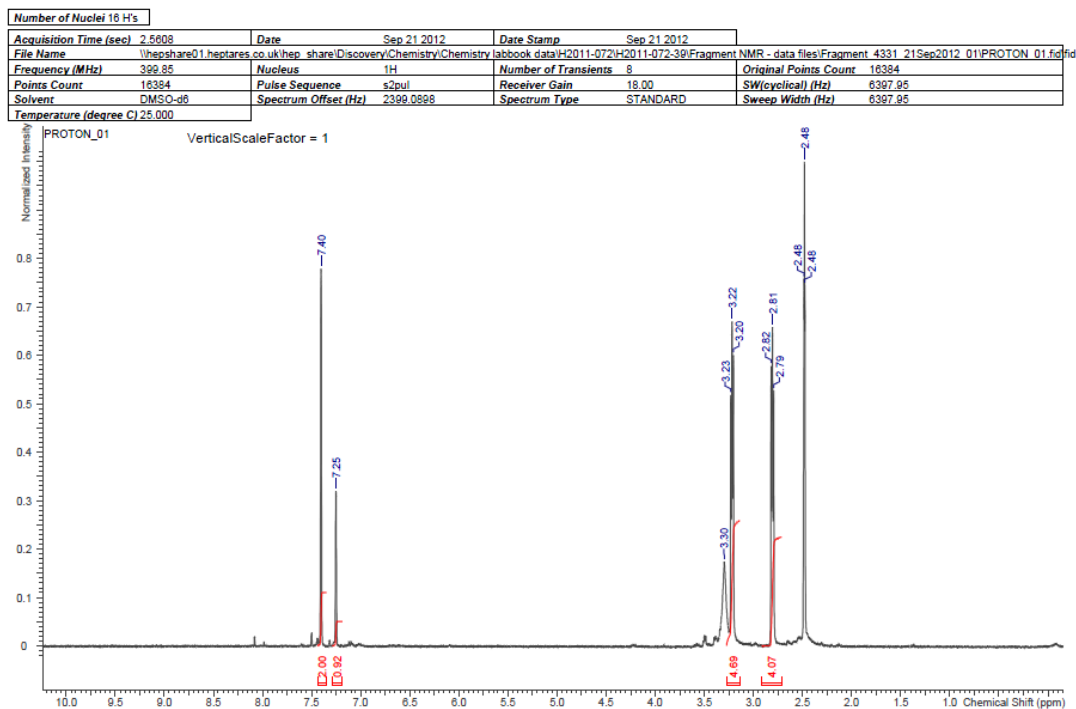

Compound **17**:  $^1\text{H}$  NMR (400 MHz,  $\text{DMSO-}d_6$ )  $\delta$  ppm 2.79 - 2.82 (m, 4 H), 3.20 - 3.24 (m, 4 H), 7.25 (s, 1 H), 7.40 (s, 2 H).

| Number of Nuclei 37 H's |                                                                                                                                                                            |                       |                |
|-------------------------|----------------------------------------------------------------------------------------------------------------------------------------------------------------------------|-----------------------|----------------|
| Acquisition Time (sec)  | 2.5608                                                                                                                                                                     | Date                  | Sep 21 2012    |
| File Name               | \\hepshare01.heptares.co.uk\hep_share\Discovery\Chemistry\Chemistry\labbook\data\H2011-072\H2011-072-39\Fragment NMR - data files\Fragment 4536_21Sep2012_01\PROTON_01.fid | Date Stamp            | Sep 21 2012    |
| Frequency (MHz)         | 399.85                                                                                                                                                                     | Nucleus               | <sup>1</sup> H |
| Points Count            | 16384                                                                                                                                                                      | Number of Transients  | 8              |
| Solvent                 | DMSO-d <sub>6</sub>                                                                                                                                                        | Receiver Gain         | 30.00          |
| Temperature (degree C)  | 25.000                                                                                                                                                                     | Spectrum Offset (Hz)  | 2399.0898      |
|                         |                                                                                                                                                                            | Spectrum Type         | STANDARD       |
|                         |                                                                                                                                                                            | Original Points Count | 16384          |
|                         |                                                                                                                                                                            | SW (cyclical) (Hz)    | 6397.85        |
|                         |                                                                                                                                                                            | Sweep Width (Hz)      | 6397.85        |

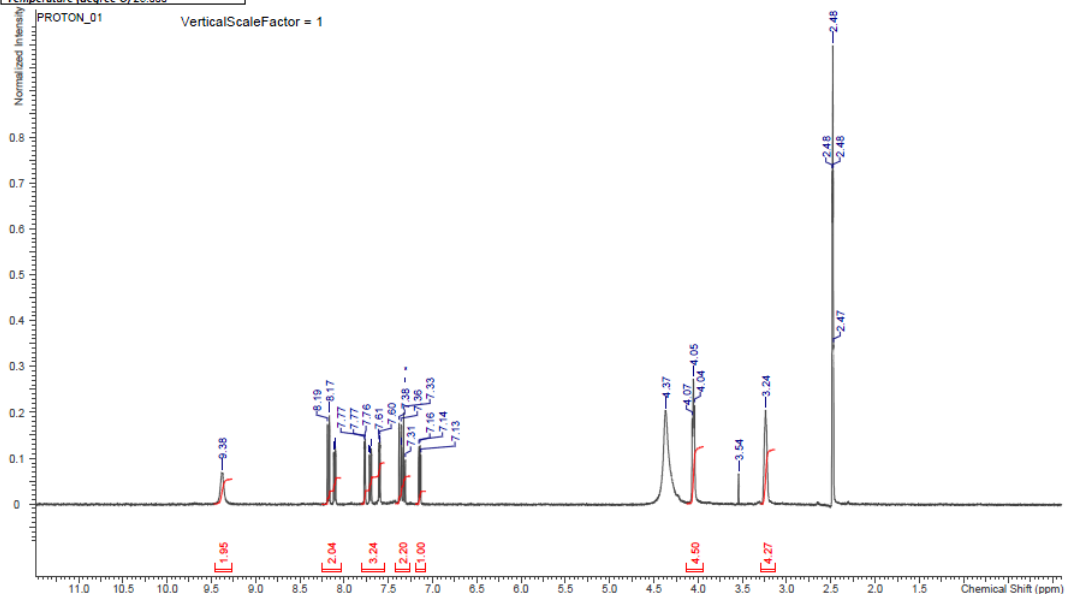

Compound **21**: <sup>1</sup>H NMR (400 MHz, DMSO-*d*<sub>6</sub>) δ ppm 3.24 (br. s, 4 H), 4.03 - 4.07 (m, 4 H), 7.15 (dd, *J*=5.1, 3.9 Hz, 1 H), 7.31 – 7.38 (m, 2 H), 7.60 (dd, *J*=5.3, 1.0 Hz, 1 H), 7.70 (dd, *J*=7.8, 1.2 Hz, 1 H), 7.77 (dd, *J*=3.7, 1.0 Hz, 1 H), 8.11 (dd, *J*=7.6, 1.4 Hz, 1 H), 8.18 (d, *J*=9.0 Hz, 1 H), 9.38 (br. s, 2 H, exchangeable).



**Muscarinic M<sub>1</sub>, M<sub>2</sub>, M<sub>3</sub> and M<sub>4</sub> acetylcholine receptor membrane binding and agonist functional assay data for compounds 12, 13, 19, 20.**

|           | pK <sub>i</sub> |                |                |                | pEC <sub>50</sub> |                |                |                | E <sub>max</sub> (%) |                |                |                |
|-----------|-----------------|----------------|----------------|----------------|-------------------|----------------|----------------|----------------|----------------------|----------------|----------------|----------------|
|           | M <sub>1</sub>  | M <sub>2</sub> | M <sub>3</sub> | M <sub>4</sub> | M <sub>1</sub>    | M <sub>2</sub> | M <sub>3</sub> | M <sub>4</sub> | M <sub>1</sub>       | M <sub>2</sub> | M <sub>3</sub> | M <sub>4</sub> |
| <b>12</b> | 5.2             | 5.4            | 5.1            | 4.5            | < 4.7             | < 4.7          | < 4.7          | < 4.7          | < 10                 | < 10           | < 10           | < 10           |
| <b>13</b> | 4.6             | 4.5            | 4.6            | < 4.2          | < 4.7             | < 4.7          | < 4.7          | < 4.7          | < 10                 | < 10           | < 10           | 16             |
| <b>19</b> | < 4.5           | 4.5            | < 4.5          | < 4.2          | < 4.7             | < 4.7          | < 4.7          | < 4.7          | < 10                 | < 10           | < 10           | < 10           |
| <b>20</b> | < 4.5           | 4.5            | 4.5            | < 4.2          | < 4.7             | < 4.7          | < 4.7          | < 4.7          | < 10                 | < 10           | < 10           | < 10           |

**Muscarinic M<sub>1</sub>-M<sub>4</sub> acetylcholine receptor membrane binding assays.**

Cell membranes prepared from CHO-K1 cells stably expressing the relevant recombinant muscarinic acetylcholine receptor (supplied by Chantest<sup>1</sup>) were incubated with [<sup>3</sup>H]-NMS (scopolamine methyl chloride (*N*-Methyl-<sup>3</sup>H)) in Krebs Ringer pH 7.7 assay buffer in a total assay volume of 0.40 mL. After 60 min incubation at room temperature the reaction was terminated by rapid filtration through GF/B 96-well glass fibre plates using a Tomtec cell harvester. Bound radioactivity was determined through liquid scintillation using Lablogic SafeScint and detected on a microbeta liquid scintillation counter. Competition binding was performed incubating membranes (5, 13, 3 or 5 µg protein / well for M<sub>1</sub>-M<sub>4</sub> respectively) with 5 nM concentration of [<sup>3</sup>H]-NMS and a range of concentrations of the test compound. IC<sub>50</sub> values were derived from fitting to a four parameter logistic equation in PRISM (GraphPad Software, San Diego, CA, USA). Apparent K<sub>i</sub> values were derived using the equation of Cheng and Prusoff.<sup>2</sup> Binding affinities are expressed as pK<sub>i</sub> values, where pK<sub>i</sub> = -log<sub>10</sub> K<sub>i</sub>.

**Muscarinic M<sub>1</sub>-M<sub>4</sub> acetylcholine receptor phospho-ERK1/2 functional assays.**

Functional assays were performed using the Alphascreen Surefire phospho-ERK1/2 assay.<sup>3</sup> ERK1/2 phosphorylation is a downstream consequence of both Gq/11 and Gi/o protein coupled receptor activation, making it highly suitable for the assessment of M<sub>1</sub>, M<sub>3</sub> (Gq/11 coupled) and M<sub>2</sub>, M<sub>4</sub> receptors (Gi/o coupled), rather than using different assay formats for different receptor subtypes. CHO cells

stably expressing the human muscarinic M<sub>1</sub>, M<sub>2</sub>, M<sub>3</sub> or M<sub>4</sub> receptor were plated (25K / well) onto 96-well tissue culture plates in MEM-alpha + 10% dialysed FBS. Once adhered, cells were serum-starved overnight. Agonist stimulation was performed by the addition of 5 µL agonist to the cells for 5 min (37 °C). Media was removed and 50 µL of lysis buffer added. After 15 min, a 4 µL sample was transferred to 384-well plate and 7 µL of detection mixture added. Plates were incubated for 2 h with gentle agitation in the dark and then read on a PHERAstar plate reader. pEC<sub>50</sub> and E<sub>max</sub> figures were calculated from the resulting data for each receptor subtype.

**Table 2: Data processing, refinement and evaluation statistics.**

|                                                                    | $\beta_1$ AR-19             | $\beta_1$ AR-20             |
|--------------------------------------------------------------------|-----------------------------|-----------------------------|
| Number of crystals                                                 | 1                           | 1                           |
| Space group                                                        | P2 <sub>1</sub>             | P2 <sub>1</sub>             |
| Cell dimensions <i>a</i> , <i>b</i> , <i>c</i> (Å),<br>$\beta$ (°) | 89.8, 61.4, 100.8,<br>108.9 | 90.0, 60.8, 101.2,<br>109.2 |
| <b>Data Processing</b>                                             |                             |                             |
| Resolution (Å)                                                     | 61.4 - 2.8                  | 51.3 - 2.7                  |
| Rmerge <sup>a</sup>                                                | 0.177 (0.647)               | 0.149 (0.415)               |
| $\langle I/\sigma(I) \rangle$ <sup>a</sup>                         | 6.8 (1.9)                   | 13.4 (1.9)                  |
| Completeness (%) <sup>a</sup>                                      | 92.5 (90.9)                 | 96.1 (91.2)                 |
| Multiplicity <sup>a</sup>                                          | 3.3 (2.7)                   | 3.0 (2.0)                   |
| Wilson B factor (Å <sup>2</sup> )                                  | 61.2                        | 59.9                        |
| <b>Refinement</b>                                                  |                             |                             |
| Total number of reflections                                        | 23841                       | 27544                       |
| Total number of atoms                                              | 4998                        | 4952                        |
| Number of sodium ions                                              | 3                           | 4                           |
| Number of waters                                                   | 35                          | 35                          |
| Total number of CHS molecules                                      | 4                           | 4                           |
| Number of detergent molecules                                      | 9                           | 8                           |
| R <sub>work</sub> <sup>b,c</sup>                                   | 0.22 (0.278)                | 0.226 (0.300)               |
| R <sub>free</sub> <sup>c,d</sup>                                   | 0.274 (0.354)               | 0.266 (0.368)               |
| r.m.s. deviation bonds (Å)                                         | 0.009                       | 0.011                       |
| r.m.s. deviation angles (°)                                        | 1.306                       | 1.434                       |
| Mean atomic B factor (Å <sup>2</sup> )                             | 45.2                        | 48.7                        |
| Estimated coordinate error (Å)                                     | 0.2                         | 0.21                        |
| Ramachandran plot<br>favoured (%) <sup>e</sup>                     | 97.2                        | 97.6                        |

|                           |   |   |
|---------------------------|---|---|
| Ramachandran plot         | 0 | 0 |
| outliers (%) <sup>e</sup> |   |   |

<sup>a</sup> Values in parentheses are for the highest resolution bin (Å) ( $\beta_1$ AR-**19**, 2.95-2.8;  $\beta_1$ AR-**20**, 2.85-2.7).

<sup>b</sup> Number of reflections used to calculate  $R_{\text{work}}$  ( $\beta_1$ AR-**19**, 22615 [94.9%];  $\beta_1$ AR-**20**, 26121 [94.9%]).

<sup>c</sup> Values in parentheses are for the highest resolution bin for refinement (Å) ( $\beta_1$ AR-**19**, 2.873–2.80;  $\beta_1$ AR-**20**, 2.77–2.70).

<sup>d</sup> Number of reflections from a randomly selected subset used to calculate  $R_{\text{free}}$  ( $\beta_1$ AR-**19**, 1214 [5.1%];  $\beta_1$ AR-**20**, 1416 [5.1%]).

<sup>e</sup> Figures obtained using MolProbity.<sup>4</sup>

**Table 3: Receptor-ligand interactions and ligand binding pocket dimensions.**

| Amino acid residue                                                      | B-W number | Secondary structure | $\beta_1$ AR-19 | $\beta_1$ AR-20 | $\beta_1$ AR-carazolol | $\beta_1$ AR-cyanopindolol |
|-------------------------------------------------------------------------|------------|---------------------|-----------------|-----------------|------------------------|----------------------------|
| Trp117                                                                  | 3.28       | H3                  | -               | -               | v der W                | v der W                    |
| Thr118                                                                  | 3.29       | H3                  | -               | -               | -                      | v der W                    |
| Asp121                                                                  | 3.32       | H3                  | Polar           | H-bond          | H-bond                 | H-bond                     |
| Val122                                                                  | 3.33       | H3                  | v der W         | v der W         | v der W                | v der W                    |
| Val125                                                                  | 3.36       | H3                  | -               | -               | v der W                | -                          |
|                                                                         |            |                     |                 |                 |                        |                            |
| Phe201                                                                  | -          | EL2                 | v der W         | v der W         | v der W                | v der W                    |
| Thr203                                                                  | -          | EL2                 | -               | -               | -                      | Polar                      |
|                                                                         |            |                     |                 |                 |                        |                            |
| Tyr207                                                                  | 5.38       | H5                  | -               | v der W         | v der W                | -                          |
| Ala208                                                                  | 5.39       | H5                  | -               | v der W         | -                      | v der W                    |
| Ser211                                                                  | 5.42       | H5                  | H-bond          | v der W         | Polar                  | H-bond                     |
| Ser215                                                                  | 5.46       | H5                  | v der W         | v der W         | v der W                | v der W                    |
|                                                                         |            |                     |                 |                 |                        |                            |
| Trp303                                                                  | 6.48       | H6                  | v der W         | v der W         | v der W                | v der W                    |
| Phe306                                                                  | 6.51       | H6                  | v der W         | v der W         | v der W                | v der W                    |
| Phe307                                                                  | 6.52       | H6                  | v der W         | v der W         | v der W                | v der W                    |
| Asn310                                                                  | 6.55       | H6                  | v der W         | v der W         | v der W                | H-bond                     |
|                                                                         |            |                     |                 |                 |                        |                            |
| Asn329                                                                  | 7.39       | H7                  | Polar           | Polar           | H-bond                 | H-bond                     |
| Tyr333                                                                  | 7.43       | H7                  | -               | Polar           | v der W                | v der W                    |
| Binding pocket dimensions:<br>distance C $\alpha$ Asn329-Ser211<br>(Å)* |            |                     | 15.8            | 15.9            | 15.8                   | 15.9                       |

Amino acid side chain contacts between  $\beta_1$ AR and ligands and dimensions of the ligand binding pocket. Ligand-receptor interactions and ligand binding pocket dimensions have been determined using different monomers which best represent the physiologically relevant conformation as follows:  $\beta_1$ AR-**19**,  $\beta_1$ AR-**20** and  $\beta_1$ AR-cyanopindolol (PDB 2VT4), monomer B;  $\beta_1$ AR-carazolol (PDB 2YCW), monomer A. A 2.8Å upper limit (donor-acceptor separation) was applied to define hydrogen (H) bonds, and an upper limit of 3.9Å was applied to van der Waals interactions. All of the residues listed in the table are identical in the human  $\beta_1$ AR, and we would therefore expect similar modes of ligand binding in the human receptor.

\* The binding pocket dimensions given are in all four cases indicative of the binding of antagonists; the binding of the full agonist isoprenaline results in a contraction of 1Å to 14.8Å.<sup>6</sup>

Abbreviations: B-W number, Ballesteros-Weinstein number;<sup>5</sup> EL2, extracellular loop 2; v der W, van der Waals.

**Figure 1.** Omit maps for the ligands **19** and **20** in the crystal structures. 2Fo-Fc maps are shown where the ligands were omitted from the phase calculation. (a) **19**, contour level  $2.5\sigma$ , (b) **20**, contour level  $1.0\sigma$ .

[a]

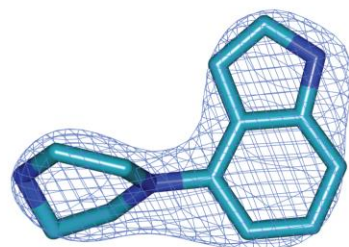

[b]

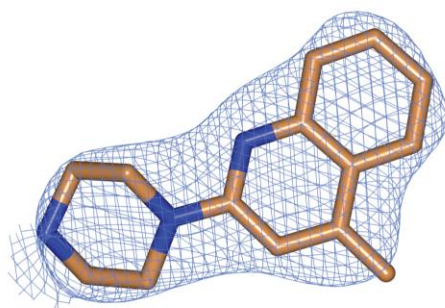

## References

1. [www.chantest.com](http://www.chantest.com)
2. Cheng Y.-C.; Prusoff, W. H. Relationship between the inhibition constant ( $K_i$ ) and the concentration of inhibitor which causes 50 per cent inhibition ( $I_{50}$ ) of an enzymatic reaction. *Biochem. Pharmacol.* **1973**, *22*, 3099-3108.
3. Crouch, M. F.; Osmond, R. I. W. New Strategies in Drug Discovery for GPCRs: High Throughput Detection of Cellular ERK Phosphorylation. *Comb. Chem. High Throughput Screening* **2008**, *11*, 344-356.
4. Davis, I. W.; Leaver-Fay, A.; Chen, V. B.; Block, J. N.; Kapral, G. J.; Wang, X.; Murray, L. W.; Arendall, W. B., 3rd; Snoeyink, J.; Richardson, J. S.; Richardson, D. C. MolProbity: all-atom contacts and structure validation for proteins and nucleic acids. *Nucleic Acids Res.* **2007**, *35*, W375-383.
5. Ballesteros, J. A.; Weinstein, H. Integrated methods for the construction of three-dimensional models and computational probing of structure-function relations in G protein-coupled receptors. *Methods Neurosci.* **1995**, *25*, 366-428.
6. Warne, T.; Moukhametzianov, M.; Baker, J. G.; Nehmé, R.; Edwards, P. C.; Leslie, A. G. W.; Schertler, G. F. X.; Tate, C. G. The structural basis for agonist and partial agonist action on a  $\beta_1$ -adrenergic receptor. *Nature* **2011**, *469*, 241-244.
